# Supplementary material for: Synergistic photothermal conversion and photocatalysis in 2D/2D MXene/Bi2S3 hybrids for efficient solar-driven water purification
Source: Royal Society of Chemistry journal article supplement (doi:10.1039/d3nr02848h), 2023-01-01
Supplement: d3nr02848h1.pdf [file d3nr02848h1.pdf]

## Supporting Information

Synergistic Photothermal Conversion and Photocatalysis in 2D/2D

MXene/Bi<sub>2</sub>S<sub>3</sub> Hybrids for Efficient Solar-Driven Water Purification

*Yang Liu<sup>a</sup>, Shu-Zhou Qu<sup>a</sup>, Ze-Run Zhou<sup>a</sup>, Xiang-Ping Song<sup>c</sup>, Liang Ma<sup>a\*</sup>, Si-Jing Ding<sup>b</sup>,  
Qu-Quan Wang<sup>d\*</sup>*

<sup>a</sup> Hubei Key Laboratory of Optical Information and Pattern Recognition, Wuhan Institute of Technology, Wuhan, 430205, P. R. China.

<sup>b</sup> School of Mathematics and Physics, China University of Geosciences (Wuhan), Wuhan, 430074, P. R. China.

<sup>c</sup> Department of Pharmacology, Xiangya School of Pharmaceutical Sciences, Central South University, Changsha, 410078, China

<sup>d</sup> School of Science, Department of Physics, Southern University of Science and Technology, Shenzhen, 518055, P. R. China.

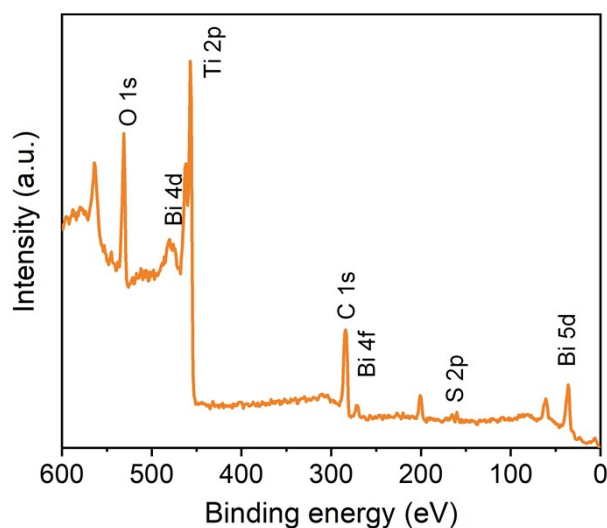

**Figure S1.** XPS survey of MXene/ $\text{Bi}_2\text{S}_3$  hybrids.

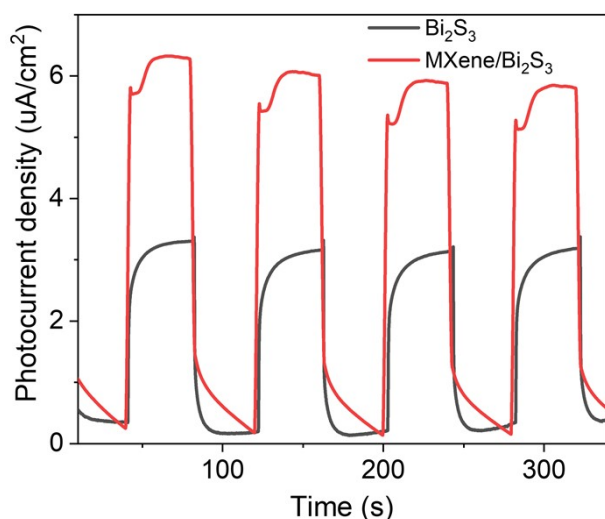

**Figure S2.** Photocurrent densities of  $\text{Bi}_2\text{S}_3$  and MXene/ $\text{Bi}_2\text{S}_3$  electrodes under light irradiation. In the measurements, Pt electrode and AgCl electrode were used as counter electrode and reference electrode,  $\text{Na}_2\text{SO}_4$  (1 M) was used as electrolyte.

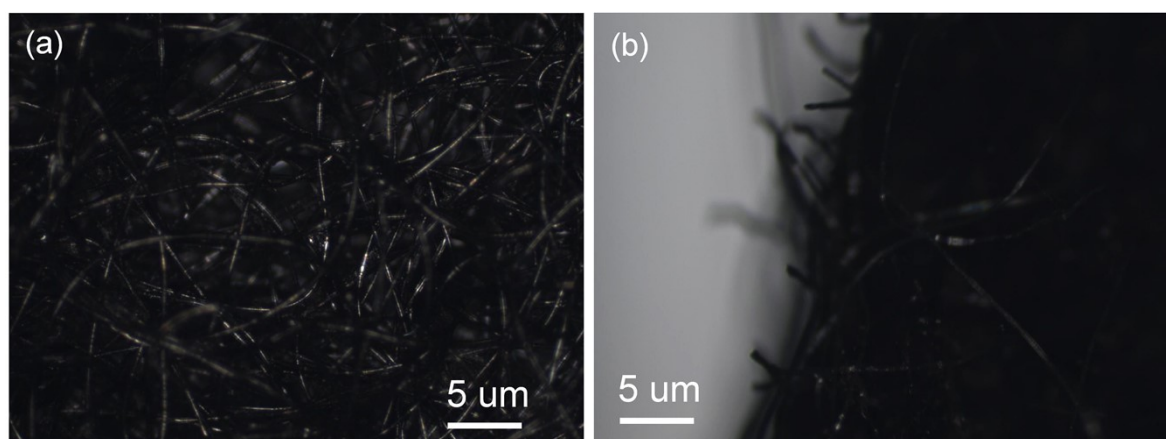

**Figure S3.** Optical images of MXene/ $\text{Bi}_2\text{S}_3$  hybrids observed on top view (a) and side view (b).

(b).

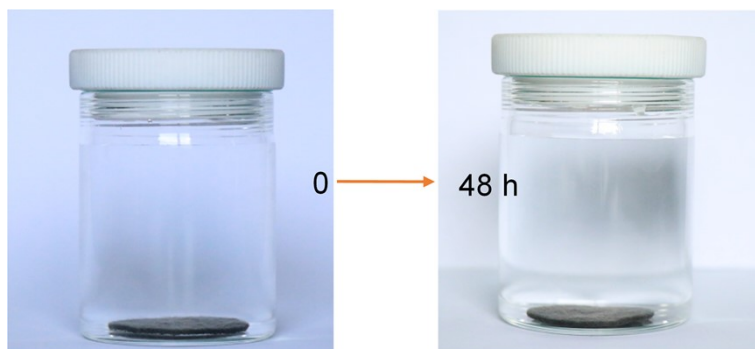

**Figure S4.** Photographs of MXene/Bi<sub>2</sub>S<sub>3</sub> membrane soaking in water for 48 h.

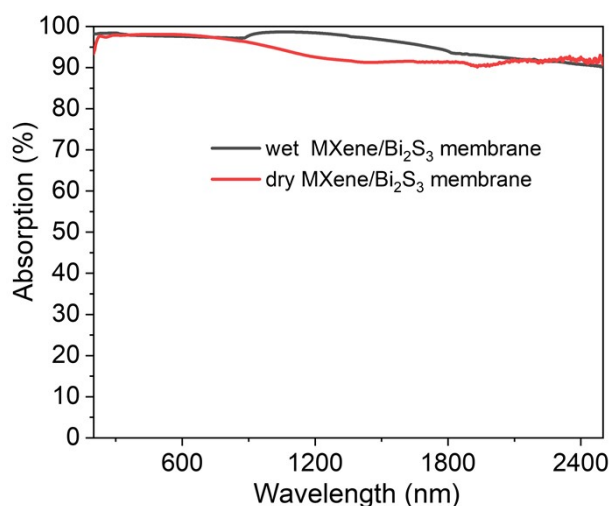

**Figure S5.** Absorption spectra of wet and dry MXene/Bi<sub>2</sub>S<sub>3</sub> membranes.

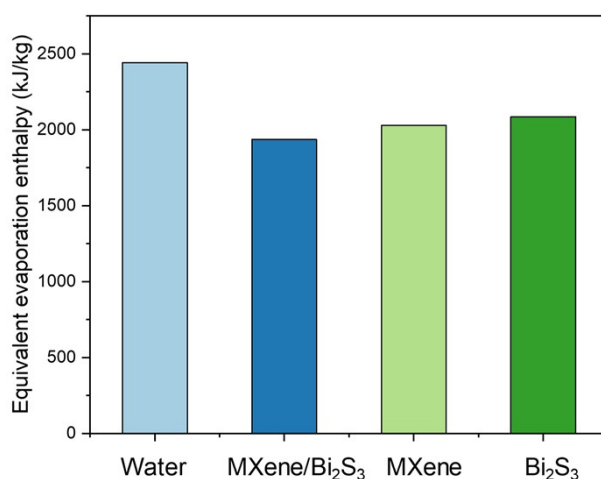

**Figure S6.** Equivalent vaporization enthalpy of Bi<sub>2</sub>S<sub>3</sub>, MXene, and MXene/Bi<sub>2</sub>S<sub>3</sub> membranes. The calculation is based on the formula  $\Delta H_0 m_0 = \Delta H_{equ} m_g$ , where  $\Delta H_0$  is the evaporation enthalpy of pure water,  $m_0$  is the spontaneous evaporation rate of water in dark,  $m_g$  is spontaneous evaporation rate of membrane,  $\Delta H_{equ}$  is the equivalent vaporization enthalpy.

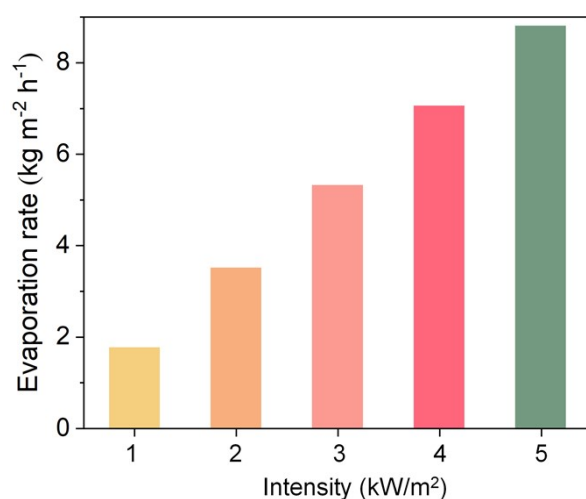

**Figure S7.** Mass change of water in the presence of MXene/Bi<sub>2</sub>S<sub>3</sub> membrane under sunlight irradiation with different intensities.

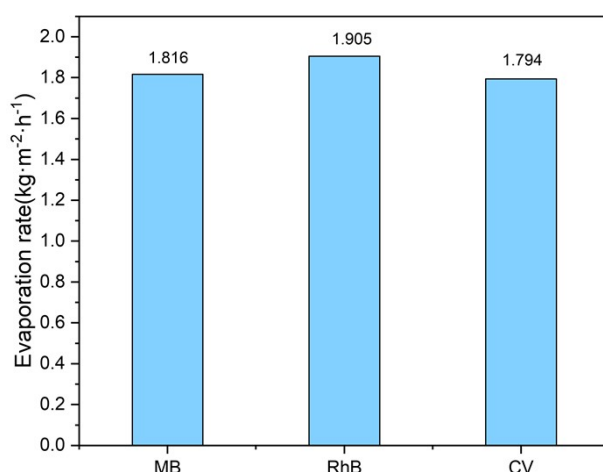

**Figure S8.** Evaporation rates of MXene/Bi<sub>2</sub>S<sub>3</sub> membrane measured in MB, RhB, and CV solution.

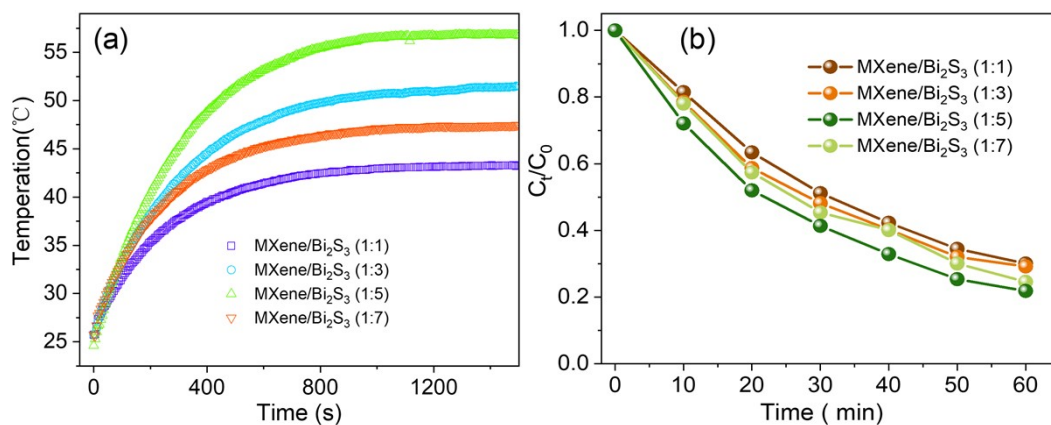

**Figure S9.** Temperature variation curves (a) under an 808 nm laser irradiation and

photocatalytic degradation of MB (b) in the presences of MXene/ $\text{Bi}_2\text{S}_3$  with different mass ratios.

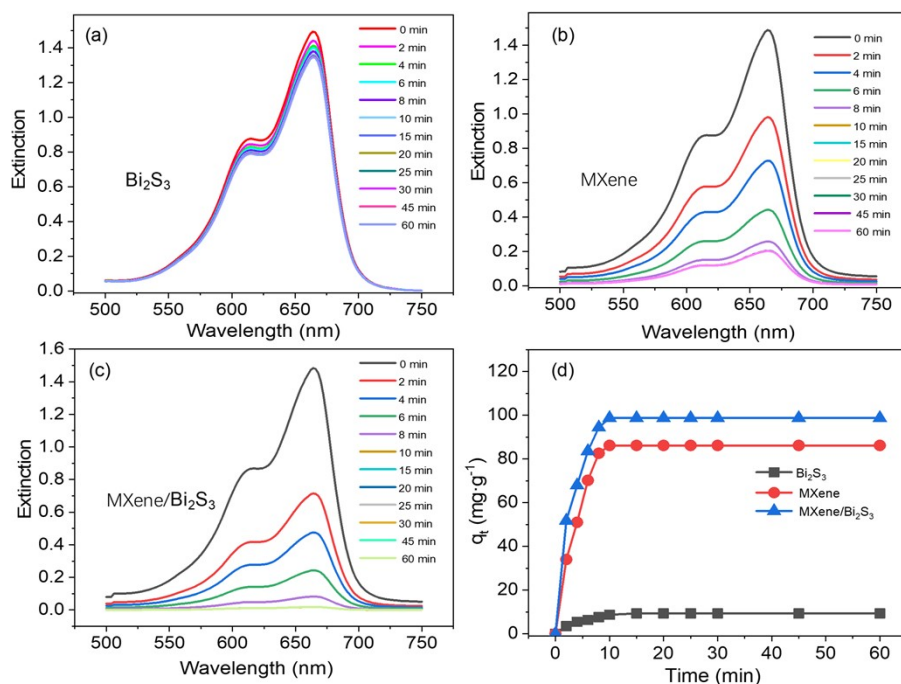

**Figure S10.** Time-dependent extinction spectra of MB in the presences of  $\text{Bi}_2\text{S}_3$  (a), MXene (b), and MXene/ $\text{Bi}_2\text{S}_3$  (c). (d) The comparison of adsorption abilities of  $\text{Bi}_2\text{S}_3$ , MXene, and MXene/ $\text{Bi}_2\text{S}_3$ .

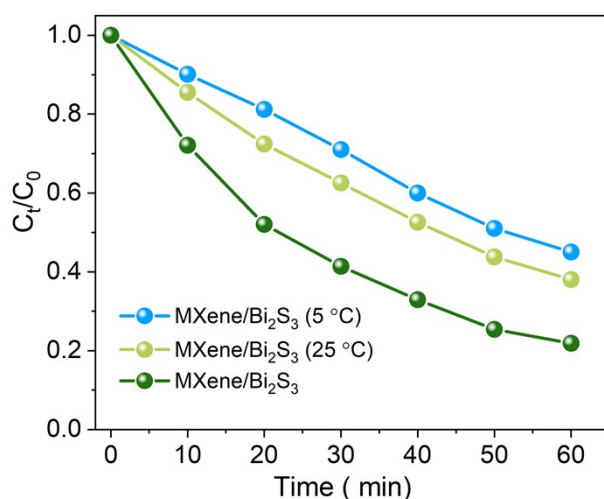

**Figure S11.** The photocatalytic degradation of MB of MXene/ $\text{Bi}_2\text{S}_3$  measured at different temperature controlled by cooling water.

**Table S1.** Comparison of the photothermal conversion efficiency (PCE) of some typical hybrids reported in previous work.

| Materials                                                                          | Excitation<br>wavelength | PCE   | Reference |
|------------------------------------------------------------------------------------|--------------------------|-------|-----------|
| MXene/Bi <sub>2</sub> S <sub>3</sub>                                               | 808 nm                   | 45.1% | This work |
| Au@Bi <sub>2</sub> S <sub>3</sub>                                                  | 808 nm                   | 35.3% | 31        |
| Cu <sub>1.94</sub> S/Bi <sub>2</sub> S <sub>3</sub>                                | 808 nm                   | 33.2% | 32        |
| Bi <sub>2</sub> S <sub>3</sub> /Cu <sub>2</sub> S/Cu <sub>3</sub> BiS <sub>3</sub> | 808 nm                   | 43.8% | 33        |
| BiOI@Bi <sub>2</sub> S <sub>3</sub>                                                | 808 nm                   | 28.5% | 34        |
| Bi <sub>2</sub> S <sub>3</sub> /FeS <sub>2</sub>                                   | 808 nm                   | 38.7% | 35        |

**Table S2.** Comparison of the evaporation rate of some typical membranes.

| Materials                                | Solar vapor<br>generation (kg m <sup>-2</sup> h <sup>-1</sup> ) | Reference |
|------------------------------------------|-----------------------------------------------------------------|-----------|
| MXene/Bi <sub>2</sub> S <sub>3</sub>     | 1.77                                                            | This work |
| MXene/CuInSe                             | 1.43                                                            | 36        |
| MXene/Cu <sub>3</sub> BiS <sub>3</sub>   | 1.32                                                            | 37        |
| Pd-Bi <sub>2</sub> S <sub>3</sub>        | 1.61                                                            | 38        |
| Borophene/CNF                            | 1.45                                                            | 39        |
| Au@Bi <sub>2</sub> MoO <sub>6</sub> -CDs | 1.69                                                            | 40        |
| MXene/rGO                                | 1.33                                                            | 41        |
